# Supplementary material
Source: Research Square preprint supplement (doi:10.21203/rs.3.rs-9176897/v1)
Supplement: Supplementary file 1 [file 5dd9701caebe0e6ecaa69cd1.docx]

**TABLES**

**Table 1: Study characteristics of the included studies**

| Author, Year | Place | Sample size  Total | Intervention | control | Dose intervention | Dose control | Age (Years)  (mean ±SD) | Age  (Years)  control | male/female Intervention | male/  female  control |
| --- | --- | --- | --- | --- | --- | --- | --- | --- | --- | --- |
| Flint 2021 13 | Germany | 67 | 34 | 33 | Subcutaneous semaglutide, | Placebo, with volume corresponding to the semaglutide dosing schedule. | 59.5 ±10. | 60.5 ±8.5 | 23/11 | 24/9 |
| Loomba 2023 14 | Europe and the USA | 71 | 47 | 24 | Semaglutide 2.4 mg once weekly, escalated from 0.24 mg to 2.4 mg over 16 weeks. | Standard dose | 59.5 years | 58.7 | 31/16 | 18/6 |
| Gad 2024 15 | Egypt and Saudi Arabia | 180 | 60,60 | 60 | I1 3→14 mg/ day,  I 2=0.25→2 mg/week | Standard dose | I1= 47.8 ± 5.4  , I2=46.8 ± 7.0 | 47.3 ± 5.7 | 32/28 | 30/30 |
| Newsome 2021 16 (A) | 143 sites in 16 countries | 320 | 80 | 80 | 0.1mg | Standard | 55.2 ±10.9 | 52.4  (10±8) | 29/51 | 36/44 |
| (B) | 78 | N/A | 0.2 mg | N/A | 59.1 ±9.9 | N/A | 26/52 | N/A |  |  |
|  |  | (C) | 82 | N/A | 0.4 mg | N/A | 54.3 ±10.2 | N/A | 35/47 | N/A |
| Romero-Gomez 2023 17 | USA | 145 | 72 | 73 | 10 mg weekly after titration | 1 mg weekly after titration | 48.1 +-11.0 years | 50.9+-10.9 years | 39/33 | 41/32 |
| Sanyal 2025 18 | 37 countries | 1197 | 534 | 266 | Starting dose 0.25 mg → titrated to 2.4 mg weekly | Placebo | 56.3 ± 11.4 years | 55.4 ± 12.0 years | 221/313 | 144 /124 |

**Table 2: Study characteristics of the included studies**

| Authors | Diabetes  intervention | Diabetes  control | Bodyweight (kg)  Intervention | Control | BMI (Mean +_SD)  Intervention | Control | STEATOSIS  intervention | Control |
| --- | --- | --- | --- | --- | --- | --- | --- | --- |
| Flint 2021 13 | 28 | 21 | 105.1±15.3 kg | 102.3± 12.7kg | ETD −9.7% (95% CI −12.6 to −6.8; p<0.0001, 72 wks.) | 25-40 kg/m² | 34 | 33 |
| Loomba 2023 14 | 35 | 18 | 95·2 (18·7) | 98.6(22.2) | 34.9 kg/m², SD 5.9 | N/A | 47 | 24 |
| Gad 2024 15 | 100 | 100 | N/A | N/A | 33.06 ± 2.1,33.57 ± 2.2 | N/A | N/A | N/A |
| Newsome 2021 16 (A) | 49(61) | 50(62) | 98.4±21.1 | 101.3±23.3 | 36.1±6.4 | 32.69 ± 2.0 | 332.0±46.2 | 348.6±35.2 |
| (B) | 51(65) | N/A | 97.1±22.0 | N/A | 35.6±6.1 | 36.1±6.6 | 347.4±55.0 | N/A |
| (C) | 49(60) | N/A | 96.6±20.1 | N/A | 35.2±6.6 | N/A | 335.7±55.8 | N/A |
| Romero-Gomez 2023 17 | 24/72 (33.3%) | 24/73 (32.9%) | 100.2 +- 18.8 kg | 94.5 +- 18.9 kg | Efino= 35.2 +- 5.7 | N/A | N/A | N/A |
| Sanyal 2025 18 | 296/534 (55.4%) | 151/266 (56.8%) | 95.4 ± 24.5 kg | 97.6 ± 24.6 kg | 34.3 ± 7.2 | Sema= 33.5 +- 5.0 | N/A | N/A |

**Table 3: GRADE Analysis**

| **Outcome** | **No. of Participants (Studies)** | **Certainty of Evidence (GRADE)** | **Summary of Effect (Semaglutide vs. Placebo)** |
| --- | --- | --- | --- |
| Mean change in ALT | 458 (3 RCTs) | High | Semaglutide consistently and significantly reduces Alanine Aminotransferase (ALT) levels across different patient populations. Reductions are seen in patients with NAFLD, non-cirrhotic NASH (F1-F3), and cirrhotic NASH (F4). |
| Mean change in AST | 458 (3 RCTs) | High | Semaglutide consistently and significantly reduces Aspartate Aminotransferase (AST) levels across multiple trials. This effect was observed in both non-cirrhotic and cirrhotic patient populations. |
| Participants having NASH resolution | 301 (2 RCTs) | Low | The effect on NASH resolution is inconsistent across different stages of fibrosis. Semaglutide significantly increased NASH resolution in non-cirrhotic (F1-F3) patients ( |
| Nausea | 457 (3 RCTs) | High | Semaglutide clearly increases the incidence of nausea. Across studies, nausea was reported in |
| Vomiting | 457 (3 RCTs) | High | Semaglutide clearly increases the incidence of vomiting. Across studies, vomiting was reported in |
| Diarrhea | 457 (3 RCTs) | High | Semaglutide increases the incidence of diarrhoea. Across studies, diarrhoea was reported in |
| Nasopharyngitis | 386 (2 RCTs) | High | The evidence consistently shows no increased risk of nasopharyngitis with semaglutide. Incidence rates were similar to or lower than placebo in the trials that reported it (e.g., |
